# Supplementary material for: A controlled co-assembly approach to tune temperature responsiveness of biomimetic proteins
Source: Royal Society of Chemistry journal article supplement (doi:10.1039/d4tb01737d), 2024-11-21
Supplement: d4tb01737d1.pdf [file d4tb01737d1.pdf]

**Supporting Information:**

**Controlled Co-assembly Approach to Tune Temperature Responsiveness of Biomimetic Proteins**

Nisal Wanasingha,<sup>a</sup> Rajkamal Balu,<sup>a</sup> Agata Rekas,<sup>b</sup> Jitendra P. Mata,<sup>c,d</sup> Naba K. Dutta<sup>a,\*</sup> and Namita Roy Choudhury<sup>a,\*</sup>

<sup>a</sup> *Dept. of Chemical and Environmental Engineering, School of Engineering, STEM College, RMIT University, Melbourne, VIC 3000, Australia*

<sup>b</sup> *National Deuteration Facility, Australian Nuclear Science and Technology Organisation (ANSTO), Lucas Heights, NSW 2234, Australia*

<sup>c</sup> *Australian Centre for Neutron Scattering, Australian Nuclear Science and Technology Organisation (ANSTO), Lucas Heights, NSW 2234, Australia*

<sup>d</sup> *School of Chemistry, University of New South Wales, Sydney 2052, Australia*

\*Corresponding Author Email: [namita.choudhury@rmit.edu.au](mailto:namita.choudhury@rmit.edu.au); [naba.dutta@rmit.edu.au](mailto:naba.dutta@rmit.edu.au)

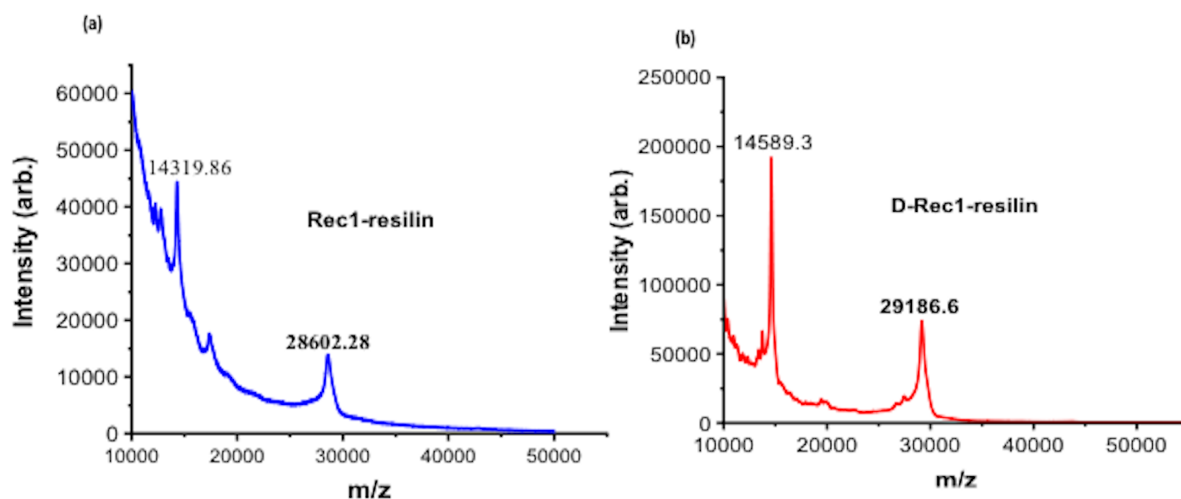

**Figure S1:** The mass spectrum of the synthesised (a) Rec1-resilin and (a) D-Rec1 protein polymers were obtained from a MALDI-TOF mass spectrometer utilising a linear positive mode. A total collection of 2000 shots were obtained for the calibration and sample measurement, where the spectrum range was set to 10,000 – 50,000  $m/z^{-1}$ . Protein calibration standard I and II (Bruker Daltonik GmbH, Leipzig) were used to establish an external calibration. Moreover, tuning the laser intensity and detector gain manually enabled optimal resolution to be achieved.<sup>1</sup> In turn, the molecular weight of the Rec1-resilin and D-Rec1 were determined to be 28.60 and 29.19 kDa.

**Consensus** GGRPSDSYGAPGGGN  
 MHHHHHHPEP PVNSYLP  
                   PSDS**SYG**APGQSGP  
                   GGRPSD**SYG**APGGGN  
                   GGRPSD**SYG**APGQGQGQGQGQGGYAGK  
                   PSD**SYG**APGGGNGN  
                   GGRPSS**SYG**APGGGN  
                   GGRPSD**TYG**APGGGN  
                   GGRPSD**TYG**APGGGGNGN  
                   GGRPSS**SYG**APGQGQNGN  
                   GGRPSS**SYG**APGSGN  
                   GGRPSD**TYG**APGGGN  
                   GGRPSD**TYG**APGGGNN  
                   GGRPSS**SYG**APGGGN  
                   GGRPSD**TYG**APGGGNGNS  
                   GGRPSS**SYG**APGQGQGGF  
                   GGRPSD**SYG**APGQNQK  
                   PSD**SYG**APGSGNGN  
                   GGRPSS**SYG**APGSGP  
                   GGRPSD**SYG**PPASG

**Figure S2:** Structural consensus and alignment of amino acid repeat sequence in rec1-resilin. Single-letter code is used.<sup>2</sup>

**Table S.1:** Amino acid composition of *Rec1-resilin*. The composition does not include the histidine tag segment after cleavage of the signal peptide.

| Amino acid residue         | Amino acid    | Symbol | No of unit | Mol%  |
|----------------------------|---------------|--------|------------|-------|
| Non-polar side             | Glycine       | Gly/G  | 104        | 34.2  |
|                            | Alanine       | Ala/A  | 19         | 6.25  |
|                            | Valine        | Val/V  | 1          | 0.328 |
|                            | Leucine       | Leu/L  | 2          | 0.657 |
|                            | Isoleucine    | Ile/I  | -          | -     |
|                            | Methionine    | Met/M  | -          | -     |
|                            | Proline       | Pro/P  | 42         | 13.81 |
|                            | Phenylalanine | Phe/F  | 1          | 0.328 |
|                            | Tryptophan    | Try/W  | -          | -     |
| Uncharged polar side chain | Serine        | Ser/S  | 44         | 14.47 |
|                            | Threonine     | Thr/T  | 6          | 1.97  |
|                            | Asparagine    | Asn/N  | 20         | 6.57  |
|                            | Glutamine     | Gln/Q  | 13         | 4.24  |
|                            | Tyrosine      | Tyr/Y  | 21         | 6.9   |
|                            | Cysteine      | Cys/C  | -          | -     |
| Charge polar side chain    | Lysine        | Lys/K  | 2          | 0.657 |
|                            | Arginine      | Arg/R  | 16         | 5.26  |
|                            | Histidine     | His/H  | -          | -     |
|                            | Aspartic acid | Asp/D  | 12         | 3.94  |
|                            | Glutamic acid | Glu/E  | 1          | 0.328 |

MKIPYVLLFLVGVAVVNALPNPLFGGLVKLSLKKKQJFEDKFENLKENVGEKVENLKENVGEKVENLKENVGEKLENIKEKAGEKFENLKD  
VGEKVENLKDNDVGDLEAAKEKAGEIKKKLVGVGEDLKDDELTKKIKISISKDEGLTLEKEGYKSDYDRNEYEERGSEHQEDNDSGYSYK  
GSEYEKYGEEKYEERRTHDKFSIGNGISAERTKSKRGERKEVEGEYEKDYERKENNGSSEYSEERERESLEKSKERYEQSSKSFSLGKSGL  
KKQDNSKYSYDKEESKLEKEKYEKTKINNERQLDEDENERRTVVGRDEQRQDDQSRDDQSRDDQSDEETGSDSDKNRGGKDTDDK  
YSETGTNKSSETKTGKRDGSKSGVTVEREKESNKKREFENKEAESSTYRDKNRSVNSGSEKSSGKDEEYSEQNSSNKSFNDDGASADY  
QTKSKKVEKNSARDKKEKEKTDRNSDGYTKTSEEREKEQSSRVNQSKGSNSRDSSESDKSGRKNKETETYSKDQAQTSERTQSKEKN  
TAPKNGKGGTSTETDGVTKNASKQKEKVPKDGSKSSTNDSEKQKQKNDQSKGQKNNQDQDSSSTNENSKTDDNVAKKEEPNNQKR  
EQKGRTRCGSRKTESKAKEDRSKKSTTDKQDRDDKDKSSKNIDKPKDGGSSDKDSEKAKPNDRSPSHKDEKAKPNDRSPSKDTEKA  
KPNDSPPSHKDEKAKHNDRSPSKDTEKAKPNDRSPSHKDEKVKPNDRSPSHKDEKVKPNDRSPSHKDEKAKPNDRSPSKDTEK  
AKPNDRSPSHKDEKVKPNDRSPSYKDEKAKPNDRSPSKDTEKAKPNDRSPSKDTEKAKPNDRSPSHKDEKVKPNDRSPSHKDE  
KAKPNDRSPDRDEKAKPNDRSPSKDTEKAKPNDRSPSKDTEKAKPNDRSPSHKDEKAKPNDRSPSKDTEKAKPNDRSPSKDT  
EKAKPNDRSPSHKDEKVKPNDRSPSYKDEKAKPNDRSPSKDTEKAKPNDRSPSKDTEKAKPNDRSPSHKDEKVKPNDRSPSHK  
TEKAKPNDRSPDRDEKAKPNDRSPSKDTEKAKPNDRSPSKDTEKAKPNDRSPSHKDEKAKPNDRSPSKDTEKAKPNDRSPSK  
DTEKAKPNDRSPSHKDEKVKPNDRSPSYKDEKAKPNDRSPSKDTEKAKPNDRSPSKDTEKAKPNDRSPSHKDEKVKPNDRSPSH  
KDEKAKPNDRSPDRDEKAKPNDRSPSKDTEKAKPNDRSPSKDTEKAKPNDRSPSHKDEKAKPNDRSPSKDTEKAKPNDRSPS  
DKDTEKTFDKNIDNKRPKDGGSSDKNVEQERENYKSESRNEFENQKSAHSRYEDNGGLKEKSSQSKNYGRDEKYSEEKERSSTGKFGSN  
DSRARSTKAEHVRKQEQETHSEQRKTRSDGVTKYNDGDEHFDSDDEKTKPNDRSPSHKDEKAKPNDRSSDKDEKTFDKNIDN  
KRPKDGSSDKNVEQERENYKSESRNEFENQKSAHSRYEDNGGLKEKSSQSKNYGRDEKYSEEKERSSTGKSGSNDRARSTKAEHVR  
RKSQEQETHSEQRGRTRSDGATTSNDNDKQYDSDDKNNSSTKHKKTVMRSEQSDSSQENSTSESKKFAKTGNSNKYEAESSHKKQEAR  
KQSNRVVEKSTDGDNEESYRSESSSSSSSSSSSSSSSTYTGSHDSSSEE

**Figure S3:** The amino acid sequence of SS-2. Single-letter code for amino acid residues has been used.<sup>3</sup>

**Table S.2:** Amino acid composition of SS based on molar percentages. Reproduced from ref.<sup>4</sup> with permission from Elsevier © 2023.

| Amino acid    | Symbol | Aramwit et al. [5] | Keawkorn et al. [6] | Terada et al. [7] |
|---------------|--------|--------------------|---------------------|-------------------|
| Alanine       | Ala/A  | 4.10               | 6.00                | 5.30              |
| Arginine      | Arg/R  | 2.87               | 3.10                | 1.80              |
| Aspartic acid | Asp/D  | 15.64              | 16.70               | 18                |
| Cysteine      | Cys/C  | 0.44               | 0.20                | <0.05             |
| Glutamic acid | Glu/E  | 4.61               | 4.40                | 4.60              |
| Glycine       | Gly/G  | 15.03              | 13.50               | 15.70             |
| Histidine     | His/H  | 1.06               | 1.30                | 1.30              |
| Isoleucine    | Ile/I  | 0.56               | 0.70                | 0.70              |
| Leucine       | Leu/L  | 1.00               | 1.10                | 1.10              |
| Lysine        | Lys/K  | 2.35               | 3.30                | 2.50              |
| Methionine    | Met/M  | 3.39               | 0.04                | <0.05             |
| Phenylalanine | Phe/F  | 0.28               | 0.50                | 0.40              |
| Proline       | Pro/P  | 0.54               | 0.70                | 0.60              |
| Serine        | Ser/S  | 33.63              | 33.40               | 32.20             |
| Threonine     | Thr/T  | 8.16               | 9.70                | 8.40              |
| Tryptophan    | Try/W  | 0.00               | 0.20                | 0.00              |
| Tyrosine      | Tyr/Y  | 3.45               | 2.60                | 3.70              |
| Valine        | Val/V  | 2.88               | 2.80                | 3.70              |

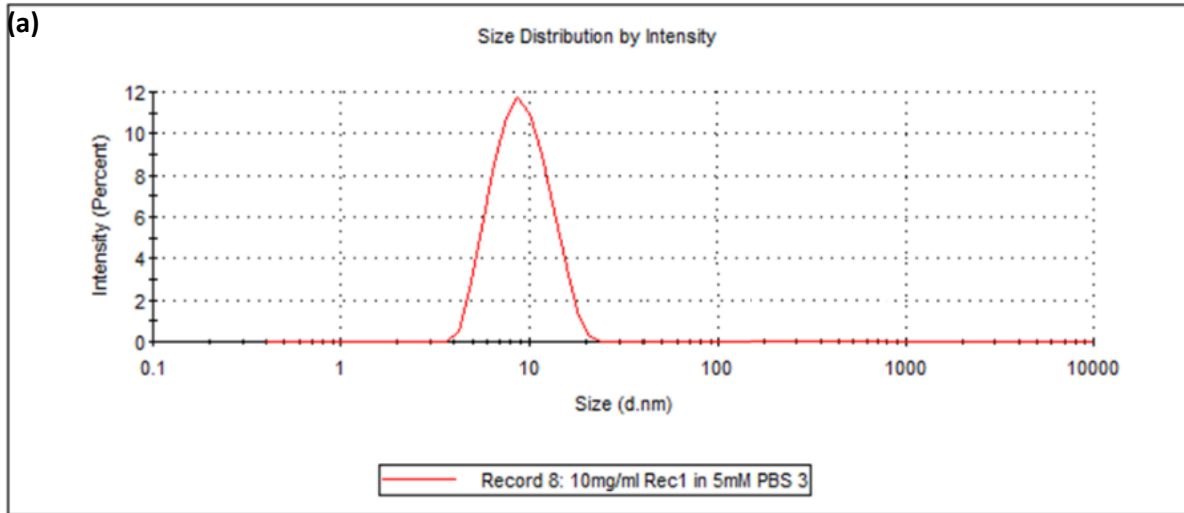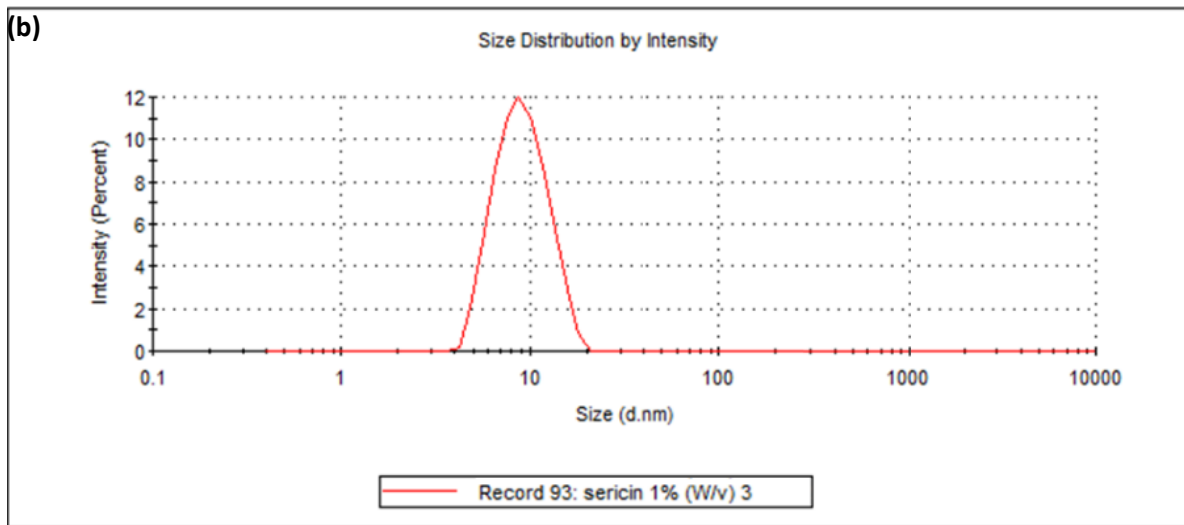

**Figure S4:** Intensity profiles of (a) Rec1-resilin and (b) SS via DLS size distribution curves

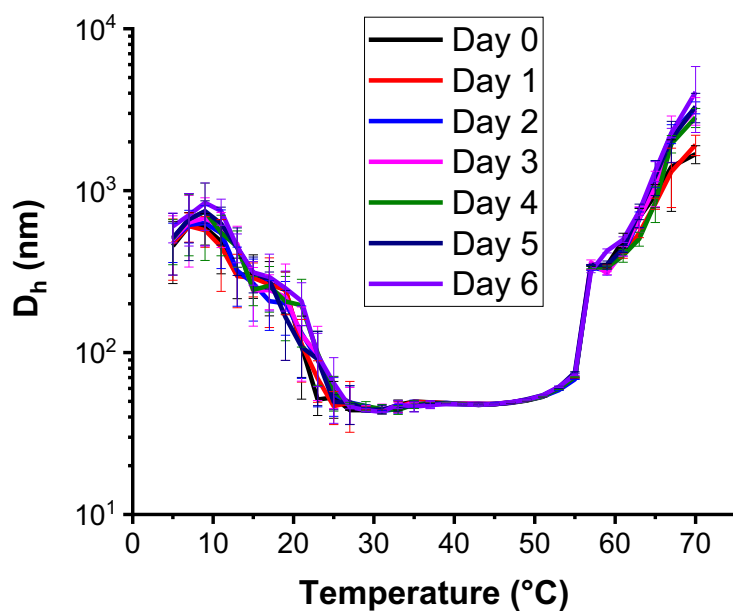

**Figure S5:** Rec1-resilin/Sericin co-assembled system  $D_h$  size measurements over an incubation period of 6 days heating from 4°C to 70°C.

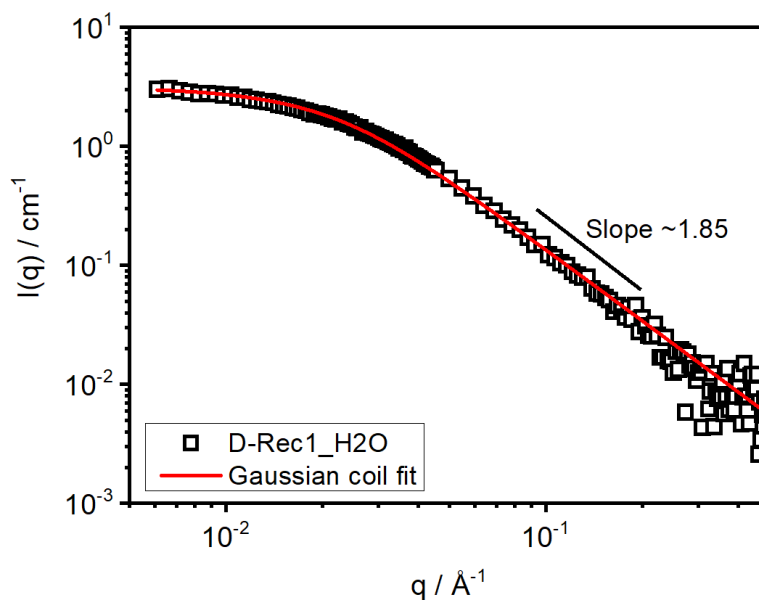

**Figure S6a:** SANS intensity profiles of D-Rec1 in water fit with model function to estimate structural parameters (adopted from ref 8).

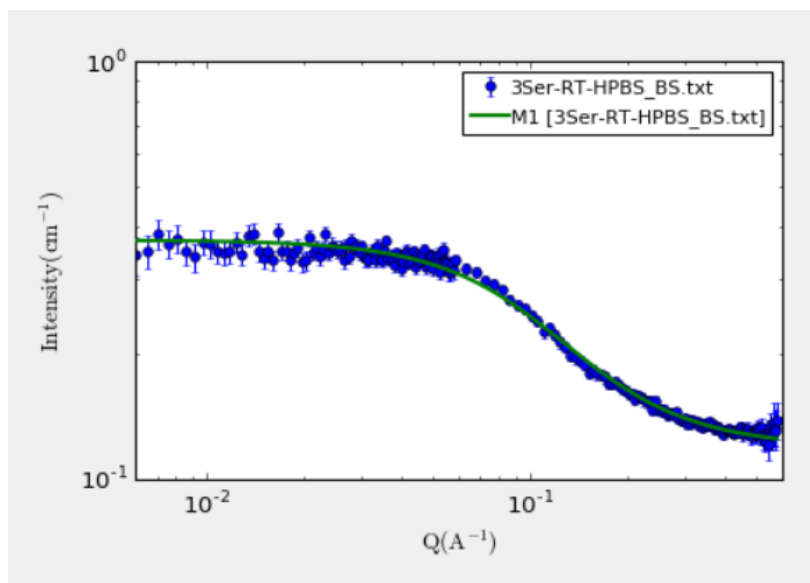

**Figure S6b:** SANS data of sericin in water fit with shape-independent model function to estimate structural parameters.



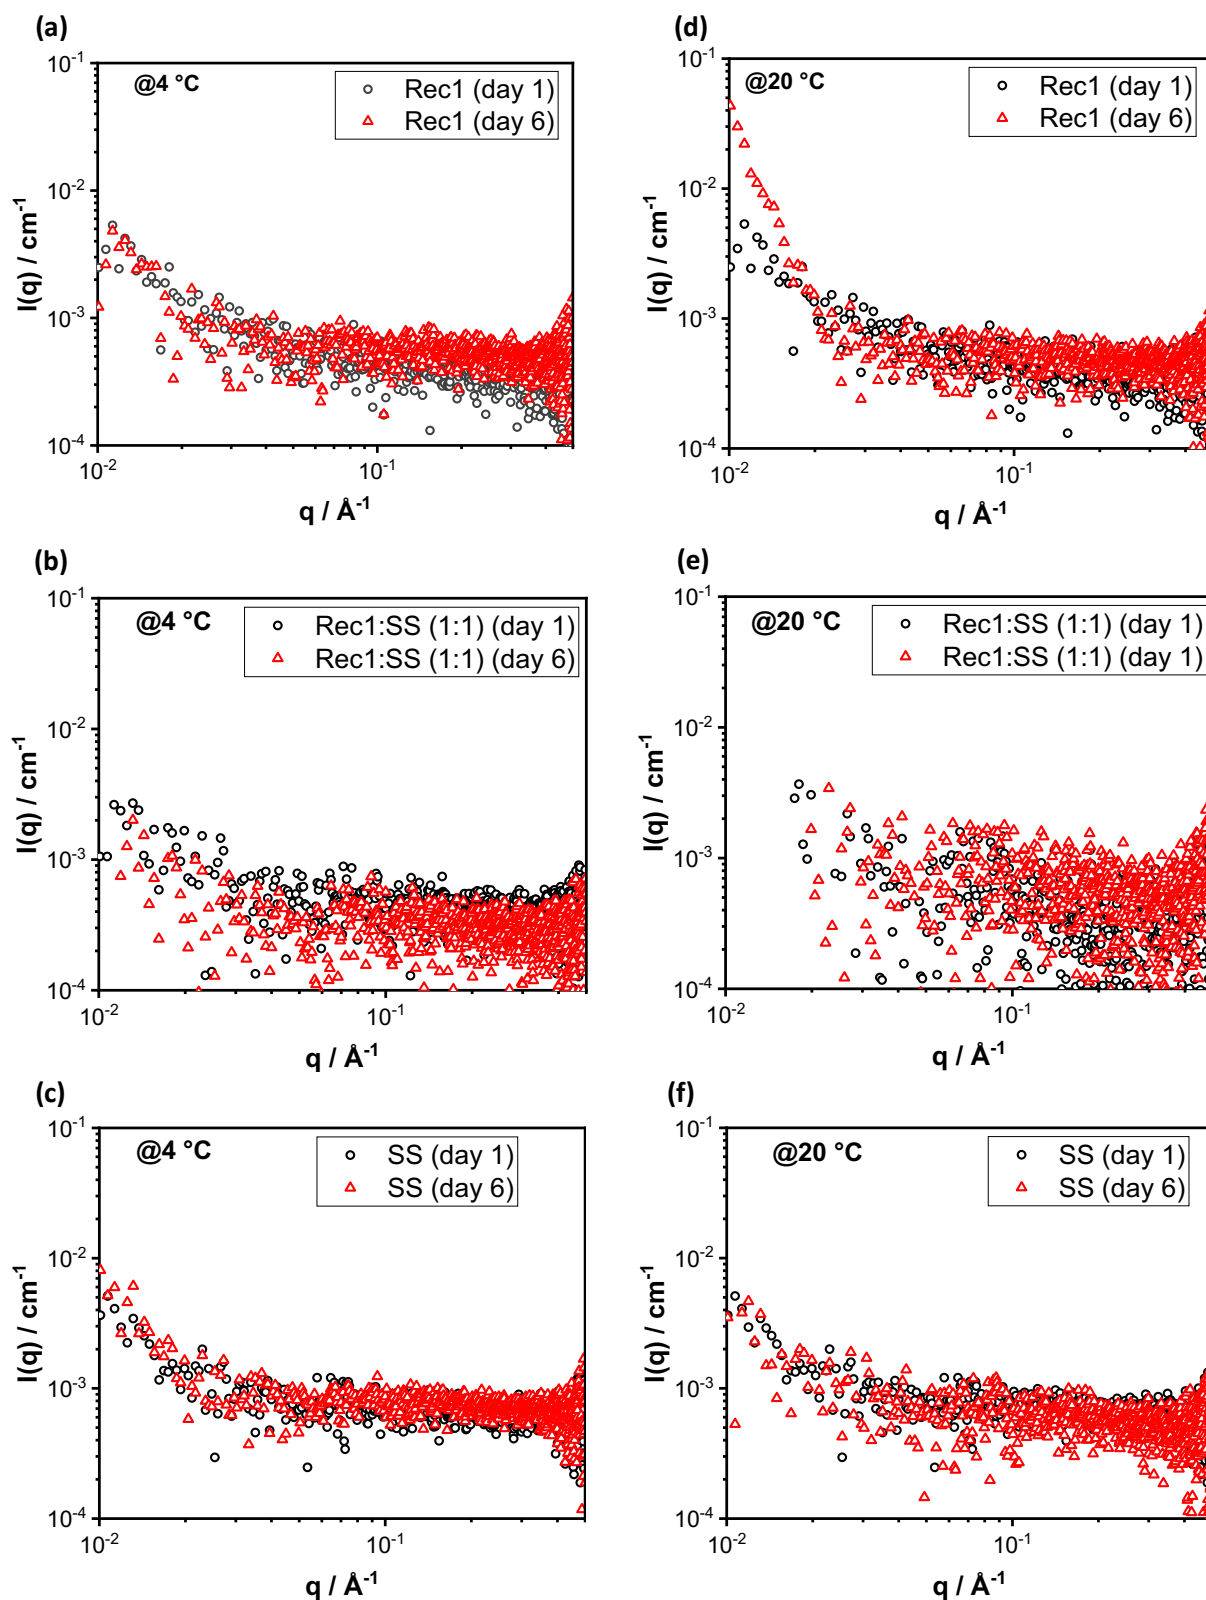

**Figure S7:** SAXS intensity profile of Rec1-resilin/SS co-assembled system (Rec1:Ser (1:1)) compared with pristine Rec1-resilin (Rec1) and SS (Ser) after 1 and 6 days of equilibration at UCST (at  $4^\circ\text{C}$ ) and room temperature (at  $20^\circ\text{C}$ ).

**Table S3:** Deconvoluted CD spectra fits interpreting the secondary structure of protein systems investigated on day 1 on incubation. Result 1 and 2 are based on the closest and average of all matching solutions with proteins, respectively.

| System                | Temp. (°C) | Result | Helix 1 | Helix 2 | Strand 1 | Strand 2 | Turns | Unordered | Total |
|-----------------------|------------|--------|---------|---------|----------|----------|-------|-----------|-------|
| Rec1- resilin         | 4          | 1      | 0.000   | 0.085   | 0.000    | 0.012    | 0.041 | 0.862     | 1.000 |
|                       |            | 2      | 0.003   | 0.031   | 0.000    | 0.015    | 0.033 | 0.918     | 1.000 |
|                       | 20         | 1      | 0.000   | 0.046   | 0.000    | 0.001    | 0.000 | 0.953     | 1.000 |
|                       |            | 2      | 0.002   | 0.017   | 0.001    | 0.012    | 0.059 | 0.908     | 0.999 |
|                       | 70         | 1      | 1.000   | 0.000   | 0.000    | 0.000    | 0.000 | 0.000     | 1.000 |
|                       |            | 2      | 0.958   | 0.039   | 0.000    | 0.003    | 0.000 | 0.000     | 1.000 |
| Sericin               | 4          | 1      | 0.000   | 0.050   | 0.063    | 0.061    | 0.109 | 0.717     | 1.000 |
|                       |            | 2      | 0.000   | 0.019   | 0.054    | 0.050    | 0.056 | 0.821     | 1.000 |
|                       | 20         | 1      | 0.000   | 0.066   | 0.000    | 0.017    | 0.000 | 0.917     | 1.000 |
|                       |            | 2      | 0.002   | 0.016   | 0.041    | 0.034    | 0.051 | 0.856     | 1.000 |
|                       | 70         | 1      | 0.000   | 0.000   | 0.000    | 0.000    | 0.000 | 1.000     | 1.000 |
|                       |            | 2      | 0.000   | 0.000   | 0.346    | 0.042    | 0.288 | 0.324     | 1.000 |
| Rec1- resilin/Sericin | 4          | 1      | 0.000   | 0.048   | 0.062    | 0.036    | 0.067 | 0.786     | 0.999 |
|                       |            | 2      | 0.001   | 0.016   | 0.022    | 0.026    | 0.047 | 0.887     | 0.999 |
|                       | 20         | 1      | 0.000   | 0.049   | 0.000    | 0.006    | 0.000 | 0.945     | 1.000 |
|                       |            | 2      | 0.002   | 0.013   | 0.004    | 0.014    | 0.049 | 0.919     | 1.001 |
|                       | 70         | 1      | 0.000   | 0.000   | 0.000    | 0.000    | 0.000 | 1.000     | 1.000 |
|                       |            | 2      | 0.005   | 0.000   | 0.225    | 0.036    | 0.026 | 0.708     | 1.000 |

**Table S4:** Deconvoluted CD spectra fits interpreting the secondary structure of protein systems investigated on day 6 on incubation. Result 1 and 2 are based on the closest and average of all matching solutions with proteins, respectively.

| System                | Temp. (°C) | Result | Helix 1 | Helix 2 | Strand 1 | Strand 2 | Turns | Unordered | Total |
|-----------------------|------------|--------|---------|---------|----------|----------|-------|-----------|-------|
| Rec1- resilin         | 4          | 1      | 0.000   | 0.076   | 0.000    | 0.014    | 0.059 | 0.851     | 1.000 |
|                       |            | 2      | 0.003   | 0.031   | 0.001    | 0.010    | 0.027 | 0.928     | 1.000 |
|                       | 20         | 1      | 0.002   | 0.044   | 0.235    | 0.121    | 0.188 | 0.410     | 1.000 |
|                       |            | 2      | 0.002   | 0.022   | 0.263    | 0.133    | 0.198 | 0.283     | 1.001 |
|                       | 70         | 1      | 0.000   | 0.046   | 0.000    | 0.000    | 0.000 | 0.954     | 1.000 |
|                       |            | 2      | 0.006   | 0.013   | 0.016    | 0.020    | 0.111 | 0.834     | 1.000 |
| Sericin               | 4          | 1      | 0.000   | 0.053   | 0.070    | 0.060    | 0.111 | 0.707     | 1.001 |
|                       |            | 2      | 0.003   | 0.022   | 0.035    | 0.038    | 0.055 | 0.847     | 1.000 |
|                       | 20         | 1      | 0.000   | 0.040   | 0.160    | 0.089    | 0.145 | 0.566     | 1.000 |
|                       |            | 2      | 0.001   | 0.016   | 0.155    | 0.086    | 0.120 | 0.620     | 0.998 |
|                       | 70         | 1      | 0.000   | 0.000   | 0.079    | 0.000    | 0.000 | 0.921     | 1.000 |
|                       |            | 2      | 0.002   | 0.004   | 0.126    | 0.031    | 0.062 | 0.774     | 0.999 |
| Rec1- resilin/Sericin | 4          | 1      | 0.000   | 0.055   | 0.039    | 0.040    | 0.097 | 0.770     | 1.001 |
|                       |            | 2      | 0.002   | 0.015   | 0.015    | 0.028    | 0.059 | 0.881     | 1.000 |
|                       | 20         | 1      | 0.000   | 0.047   | 0.184    | 0.093    | 0.140 | 0.535     | 0.999 |
|                       |            | 2      | 0.004   | 0.019   | 0.195    | 0.103    | 0.152 | 0.528     | 1.001 |
|                       | 70         | 1      | 0.027   | 0.137   | 0.000    | 0.064    | 0.185 | 0.587     | 1.000 |
|                       |            | 2      | 0.050   | 0.109   | 0.007    | 0.056    | 0.123 | 0.655     | 1.000 |

## **References**

1. R. Balu, R. Knott, N. P. Cowieson, C. M. Elvin, A. Hill, N. R. Choudhury and N. K. Dutta, *Scientific Reports*, 2015, **5**.
2. M. Y. Truong, N. K. Dutta, N. R. Choudhury, M. Kim, C. M. Elvin, A. J. Hill, B. Thierry and K. Vasilev, *Biomaterials*, 2010, **31**, 4434-4446.
3. B. Kludkiewicz, Y. Takasu, R. Fedic, T. Tamura, F. Sehnal and M. Zurovec, *Insect biochemistry and molecular biology*, 2009, **39**, 938-946.
4. M. Saad, L. M. El-Samad, R. A. Goma, M. Augustyniak and M. A. Hassan, *International Journal of Biological Macromolecules*, 2023, 126067.
5. P. Aramwit, O. Keongamaroon, T. Siritientong, N. Bang and O. Supasyndh, *BMC nephrology*, 2012, **13**, 1-11.
6. W. Keawkorn, N. Limpeanchob, W. Tiyaboonchai, S. Pongcharoen and M. Sutteerawattananonda, *Science Asia*, 2013, **39**, 252-256.
7. S. Terada, T. Nishimura, M. Sasaki, H. Yamada and M. Miki, *Cytotechnology*, 2002, **40**, 3-12.
8. R. Balu, N. Wanasingha, J. P. Mata, A. Rekas, S. Barrett, G. Dumsday, A. W. Thornton, A. J. Hill, N. Roy Choudhury and N. K. Dutta, *Science advances*, 2022, **8**, eabq2202.
